# THE JOURNAL OF NEUROPSYCHIATRY and Clinical Neurosciences

The Official Journal of the American Neuropsychiatric Association

## In this issue:

- Neurodevelopmental Pathways to Aggression: A Model to Understand and Target Treatment in Youth
- Brain Neuroimaging in Cannabis Use: A Review
- Neuropsychological and Neurobehavioral Correlates of Aggression Following Traumatic Brain Injury
- Cognitive Predictors of Response to Treatment for Depression in Multiple Sclerosis
- Obsessive-Compulsive Symptoms in Heart Disease Patients With and Without History of Rheumatic Fever

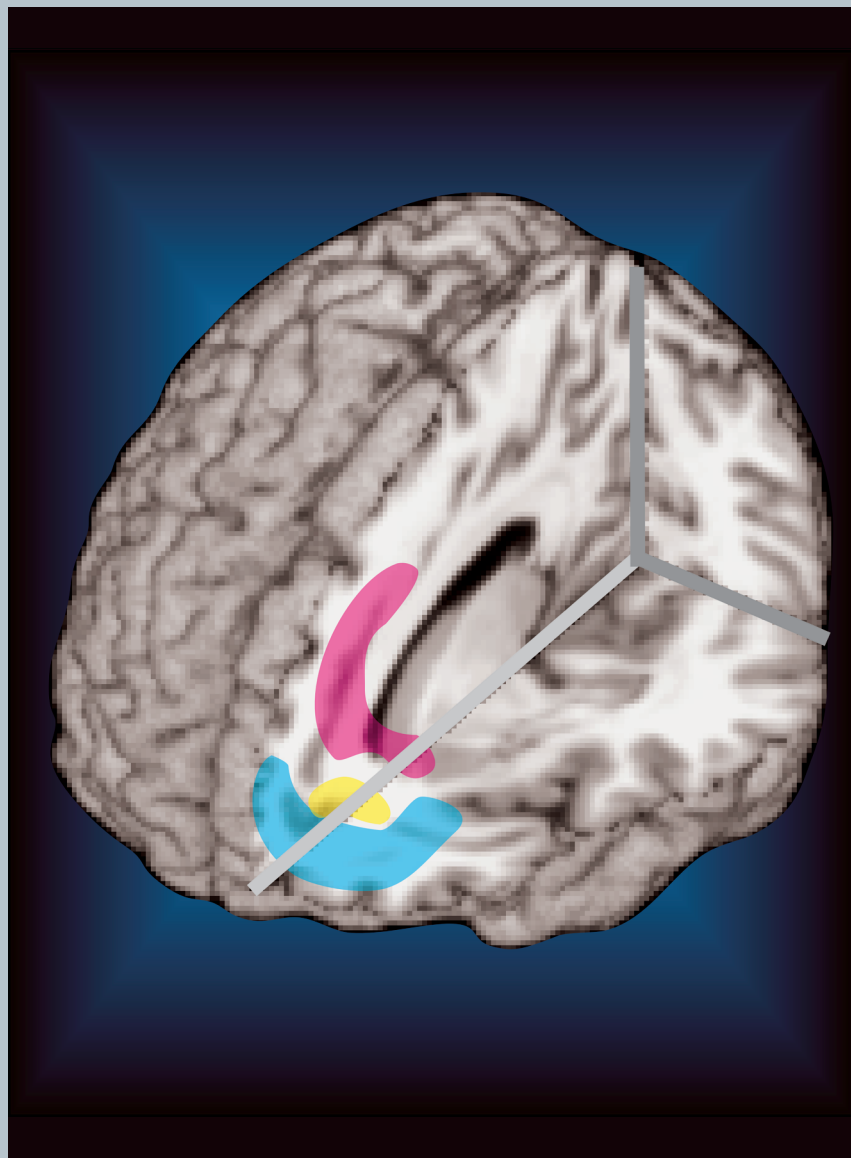

Source: https://psychiatryonline.org/doi/suppl/10.1176/jnp.2006.18.issue-3/suppl_file/cover.pdf
